# Supplementary material
Source: PubMed Central journal article supplement (PMC7153462)
Supplement: NIHMS1543814-supplement-Sup_Tab_Fig.pdf [file NIHMS1543814-supplement-Sup_Tab_Fig.pdf]

Supplemental Fig. 1

a.

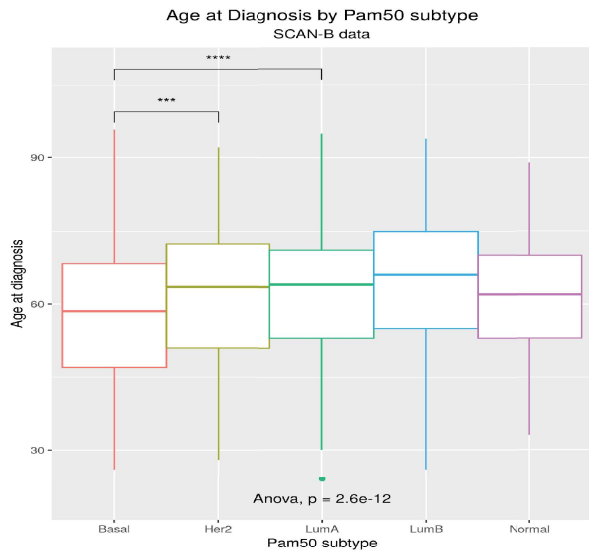

b.

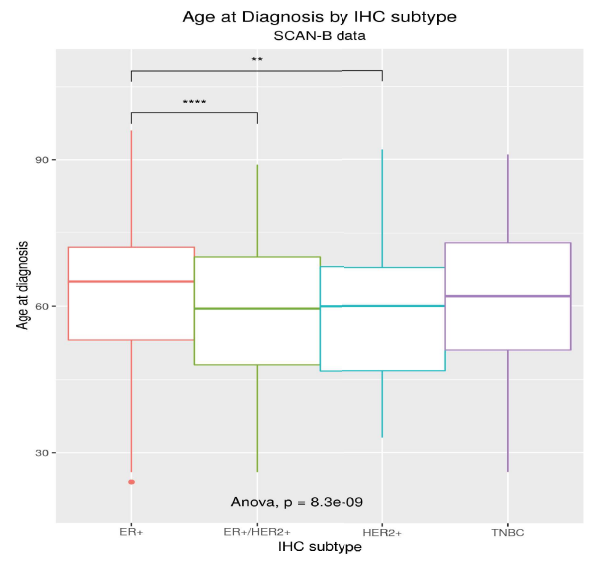

c.

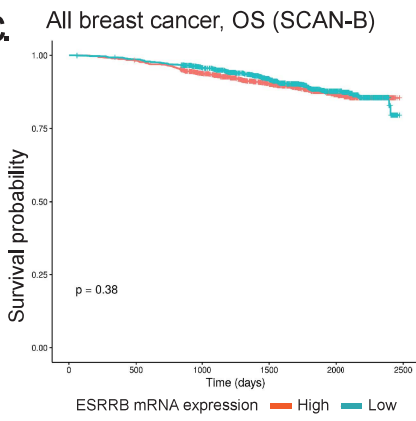

d.

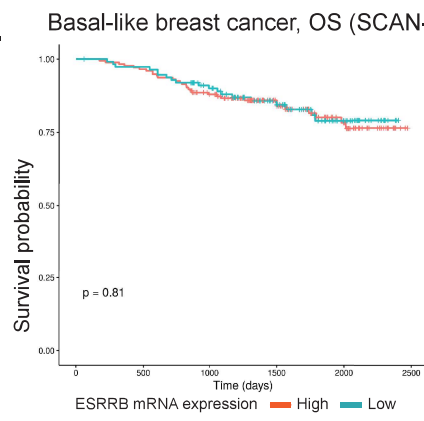

e.

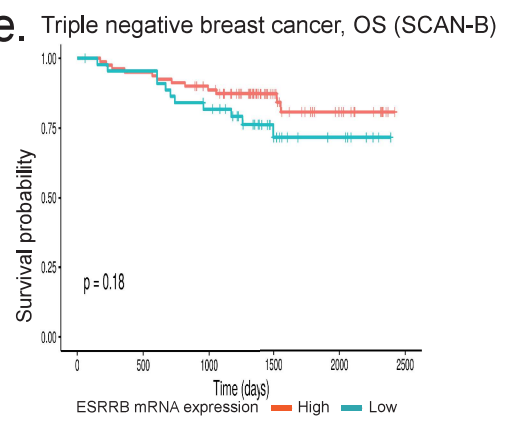

f.

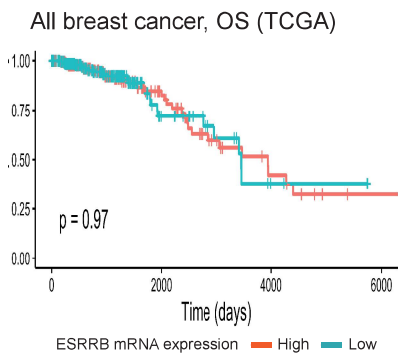

g.

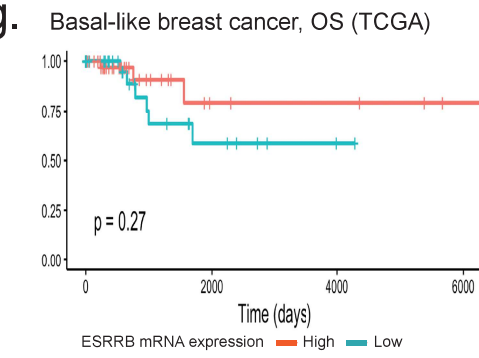

h.

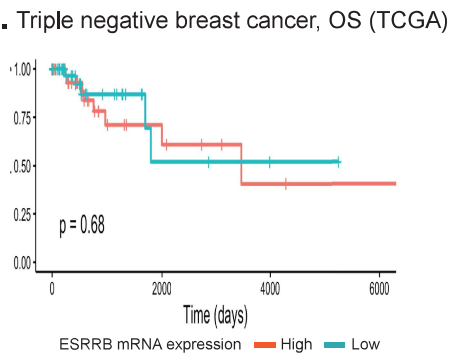

Supplemental Fig. 2

a.

**Age**

| Race | mean  | Classification | n  | mean  |
|------|-------|----------------|----|-------|
| CW   | 53.68 | TNBC           | 17 | 56.76 |
|      |       | NTN            | 20 | 52.59 |
| AA   | 53.23 | TNBC           | 39 | 53.29 |
|      |       | NTN            | 30 | 54.18 |

b.

**Mean ESRRB CN by Tumor size**

| Tumor size | Correlative stage | CW, mean=0.775 |       |   |       |       |    | AA, mean=0.591 |       |    |       |       |    |
|------------|-------------------|----------------|-------|---|-------|-------|----|----------------|-------|----|-------|-------|----|
|            |                   | TNBC           |       |   | NTN   |       |    | TNBC           |       |    | NTN   |       |    |
|            |                   | mean           | sd    | n | mean  | sd    | n  | mean           | sd    | n  | mean  | sd    | n  |
| >0.1 ≤ 0.5 | T1a               | -              | -     | - | 1.197 | 0.000 | 1  | 0.580          | 0.000 | 1  | 0.162 | 0.000 | 1  |
| > 0.5 ≤ 1  | T1b               | 0.829          | 0.000 | 1 | 1.330 | 0.451 | 2  | 0.760          | 0.247 | 10 | 0.945 | 0.452 | 9  |
| > 1 ≤ 2    | T1c               | 0.761          | 0.906 | 6 | 0.630 | 0.681 | 11 | 0.459          | 0.612 | 14 | 0.731 | 0.848 | 12 |
| > 2 ≤ 5    | T2                | 0.224          | 0.262 | 5 | 0.943 | 0.491 | 6  | 0.165          | 0.732 | 10 | 0.547 | 0.418 | 5  |
| >5         | T3                | 0.285          | 0.112 | 3 | -     | -     | -  | 0.882          | 0.267 | 3  | 0.676 | 0.365 | 2  |

c.

**Pathology**

| Race | Classification | Pathology   | % patients |
|------|----------------|-------------|------------|
| CW   | TNBC           | In situ/IDC | 23.5%      |
|      |                | IDC         | 64.7%      |
|      |                | Other       | 11.8%      |
|      | NTN            | In situ/IDC | -          |
|      |                | IDC         | 80.0%      |
|      |                | Other       | 20.0%      |
| AA   | TNBC           | In situ/IDC | 30.8%      |
|      |                | IDC         | 69.2%      |
|      |                | Other       | -          |
|      | NTN            | In situ/IDC | 60.0%      |
|      |                | IDC         | 23.3%      |
|      |                | Other       | 16.7%      |

d.

**Lymph node status**

| Race | Classification | % patients |          |     |
|------|----------------|------------|----------|-----|
|      |                | Negative   | Positive | NA  |
| CW   | TNBC           | 47%        | 29%      | 24% |
|      | NTN            | 45%        | 40%      | 15% |
| AA   | TNBC           | 56%        | 44%      | 0%  |
|      | NTN            | 50%        | 37%      | 13% |

e.

**Metastasis**

| Race | Classification | % patients |       |         |
|------|----------------|------------|-------|---------|
|      |                | None       | Local | Distant |
| CW   | TNBC           | 59%        | 24%   | 18%     |
|      | NTN            | 45%        | 30%   | 25%     |
| AA   | TNBC           | 62%        | 21%   | 18%     |
|      | NTN            | 63%        | 23%   | 13%     |

Supplemental Fig. 3

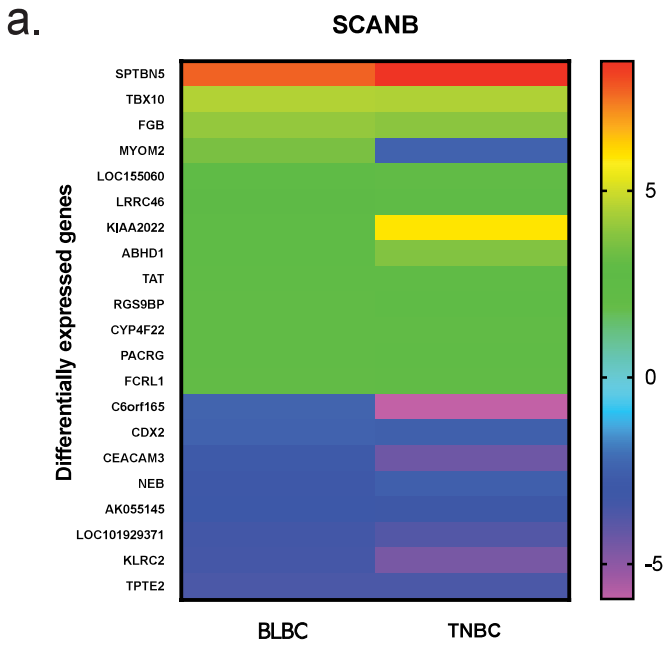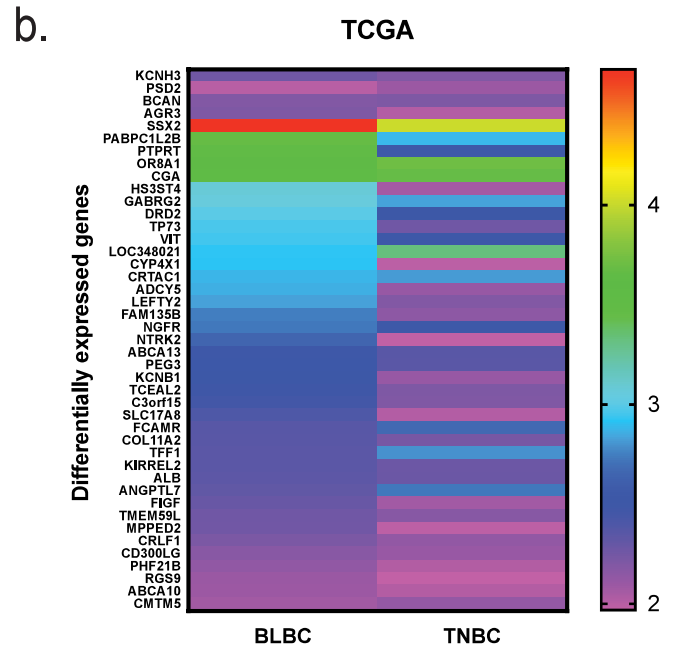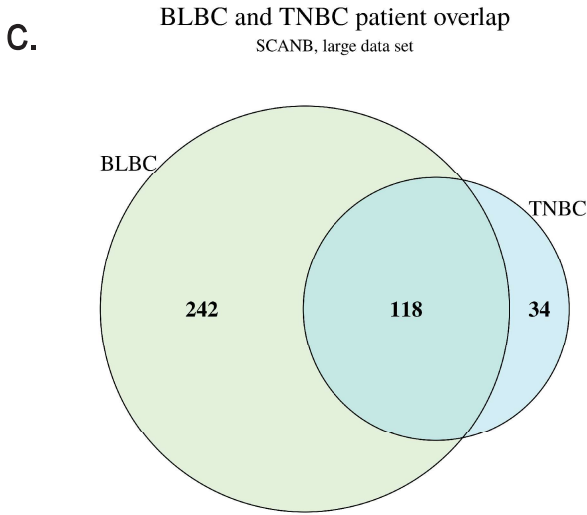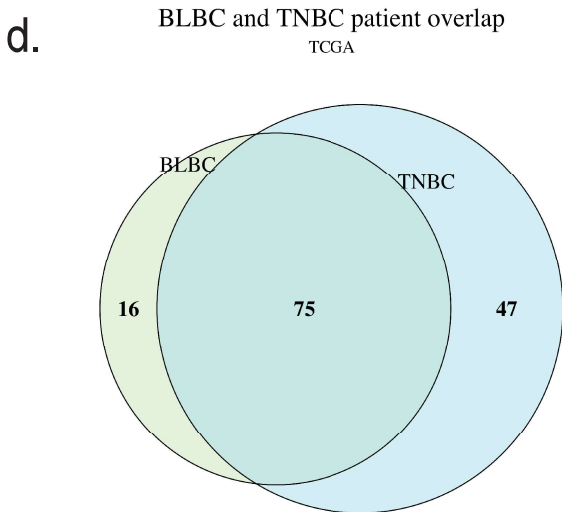

**e.**

| SCAN-B, BLBC |           |          |                   |
|--------------|-----------|----------|-------------------|
|              | Motif     | E-value  | Unersered E-value |
| 1            | AAATAYAA  | 4.00E-17 | 4.00E-17          |
| 2            | GTAGAGAY  | 8.40E-17 | 8.40E-17          |
| 3            | GGATTAYA  | 1.00E-15 | 1.00E-15          |
| 4            | GAGGCTGA  | 1.30E-14 | 1.30E-14          |
| 5            | AAAAAAAA  | 1.60E-13 | 1.60E-13          |
| 6            | AGTAGCTG  | 2.20E-13 | 2.20E-13          |
| 7            | TCACYGCA  | 3.00E-13 | 3.00E-13          |
| 8            | ACTGYACT  | 7.20E-13 | 7.20E-13          |
| 9            | GAGCCTGC  | 2.30E-12 | 2.30E-12          |
| 10           | CACCRRCR  | 1.90E-10 | 7.60E-11          |
| 11           | GCTCACRC  | 2.60E-10 | 2.60E-10          |
| 12           | CCKCRRCC  | 4.60E-10 | 4.60E-10          |
| 13           | GTCTCGAW  | 1.20E-09 | 4.50E-10          |
| 14           | GASACAGA  | 8.10E-10 | 2.70E-09          |
| 15           | CAAAGTGC  | 1.50E-09 | 1.50E-09          |
| 16           | AAATTAGC  | 1.60E-08 | 7.70E-10          |
| 17           | GCAGGAGR  | 2.40E-07 | 2.40E-07          |
| 18           | GCTCAGGM  | 4.80E-07 | 4.80E-07          |
| 19           | TATTTWTW  | 1.50E-06 | 1.80E-11          |
| 20           | CYGGGYTC  | 2.30E-06 | 1.90E-06          |
| 21           | CTGTARTC  | 3.90E-06 | 1.30E-12          |
| 22           | GBGCACAGA | 4.70E-06 | 6.90E-07          |
| 23           | CACCCGCS  | 8.00E-06 | 6.80E-04          |
| 24           | GGTGAAC   | 2.50E-05 | 2.50E-05          |
| 25           | GAGGCMGA  | 7.40E-05 | 7.40E-05          |
| 26           | CACYGTGC  | 8.70E-05 | 8.70E-05          |
| 27           | TTTTAAAA  | 8.70E-05 | 2.40E-04          |
| 28           | GAGHGAGA  | 1.60E-04 | 9.50E-06          |
| 29           | GTGTGTGY  | 1.90E-04 | 5.50E-04          |
| 30           | GAGARCCG  | 2.70E-04 | 2.70E-04          |
| 31           | ARGTGATC  | 7.50E-04 | 3.50E-04          |
| 32           | ACCATGCC  | 1.30E-03 | 1.30E-03          |
| 33           | CACSTGCC  | 1.80E-03 | 4.10E-04          |
| 34           | AKWAAATA  | 3.70E-03 | 2.50E-04          |
| 35           | CCCRCCYC  | 3.80E-03 | 3.90E-05          |
| 36           | GAGAYGGA  | 2.30E-03 | 8.30E-05          |
| 37           | CCCSRCSC  | 8.80E-03 | 3.80E-04          |
| 38           | AAAAAYAA  | 2.00E-02 | 1.90E-02          |
| 39           | GAAATAAK  | 2.40E-02 | 1.20E-02          |

  

| SCAN-B, TNBC |          |          |                   |
|--------------|----------|----------|-------------------|
|              | Motif    | E-value  | Unersered E-value |
| 1            | TAMAAATA | 2.20E-15 | 2.20E-15          |
| 2            | CACKGCAC | 3.20E-13 | 3.20E-13          |
| 3            | CRGCCTCC | 6.50E-12 | 6.50E-12          |
| 4            | AAAAAWAA | 1.80E-11 | 2.90E-11          |
| 5            | CTGTAATC | 2.90E-11 | 2.90E-11          |
| 6            | AGCTTGGA | 1.00E-09 | 4.20E-09          |
| 7            | CCAGCTTA | 1.90E-09 | 2.30E-10          |
| 8            | GAGRCGGA | 3.60E-09 | 3.60E-09          |
| 9            | GCCYGGCC | 4.70E-09 | 1.60E-09          |
| 10           | BAGACAGA | 4.50E-08 | 4.50E-08          |
| 11           | AYATATRT | 1.20E-07 | 1.20E-07          |
| 12           | AAAAAWTA | 2.20E-07 | 5.90E-08          |
| 13           | AAATAAAH | 2.70E-07 | 1.10E-07          |
| 14           | CAGTGARC | 3.80E-07 | 3.80E-07          |
| 15           | CCACDCCC | 1.10E-06 | 3.80E-07          |
| 21           | CACCRYGC | 1.80E-06 | 1.10E-07          |
| 16           | CTCCTGAC | 6.00E-06 | 9.90E-07          |
| 17           | GCVCVCGC | 7.70E-06 | 7.70E-06          |
| 18           | TGGWGA   | 8.60E-06 | 3.80E-07          |
| 19           | AGGCAGGA | 8.90E-06 | 8.90E-06          |
| 20           | SGAGACCA | 9.90E-06 | 2.00E-05          |
| 22           | ATCGCTTG | 1.80E-05 | 1.80E-05          |
| 23           | CWCACAC  | 2.40E-05 | 2.40E-05          |
| 24           | AAGTCTCY | 3.50E-05 | 3.50E-05          |
| 25           | AMAGAAAA | 5.40E-05 | 1.20E-04          |
| 26           | CABAGTGA | 5.80E-05 | 5.80E-05          |
| 27           | GTAGAGAY | 6.50E-05 | 2.80E-05          |
| 28           | ATTWTAWA | 1.30E-04 | 4.60E-06          |
| 30           | GCCTGACC | 1.40E-04 | 7.90E-04          |
| 29           | CACCRCAC | 3.80E-04 | 1.40E-05          |
| 31           | GCGGCGCB | 1.20E-03 | 5.10E-04          |
| 32           | TCACITRA | 1.30E-03 | 1.30E-03          |
| 33           | CTGCKKCC | 1.60E-03 | 1.40E-04          |
| 34           | ACTACAGG | 3.80E-03 | 5.90E-04          |
| 35           | CCAGTVC  | 6.10E-03 | 1.00E-04          |
| 36           | CTGGYTA  | 6.20E-03 | 1.50E-04          |
| 37           | AAAAAAH  | 7.30E-03 | 3.40E-04          |
| 38           | CTCCAYC  | 1.00E-02 | 6.50E-04          |
| 39           | CTGCRCC  | 1.70E-02 | 1.00E-04          |
| 40           | CCGCDGCC | 1.70E-02 | 3.30E-02          |

Supplemental Table 1 DEGs in *ESRRB* high versus low patients, SCAN-B and TCGA

| SCAN-B, BLBC  |              |              | SCAN-B, TNBC |              |         | TCGA, BLBC |             |            | TCGA, TNBC |             |            |
|---------------|--------------|--------------|--------------|--------------|---------|------------|-------------|------------|------------|-------------|------------|
| Gene          | logFC        | P.Value      | Gene         | logFC        | P.Value | Gene       | logFC       | P.Value    | Gene       | logFC       | P.Value    |
| SPTBN5        | 7.639370222  | 0.000873051  | SPTBN5       | 8.474119915  | 0.00276 | ALPI       | 4.769925    | 0.00191946 | ADAM7      | 5.714245518 | 0.03321954 |
| FLG           | 6.994851245  | 0.030036705  | EXOC3L4      | 8.03463058   | 0.00008 | PRAMEF8    | 4.70043972  | 0.00392003 | LOC642929  | 4.857980995 | 0.00145424 |
| BC065766      | 6.718097379  | 0.031511173  | KIAA2022     | 5.909117267  | 0.00019 | SSX2       | 4.67939373  | 0.01316319 | GAGE2D     | 4.810456685 | 0.0383465  |
| SFTPA2        | 6.27596873   | 0.00234021   | UGT2B15      | 5.198585536  | 0.04513 | OSTN       | 4.1337835   | 0.00176187 | ELSPBP1    | 4.169925001 | 0.02105551 |
| TMEFF2        | 5.935253136  | 0.029022906  | PAH          | 4.903177801  | 0.00259 | UGT2B11    | 3.81531009  | 0.02233415 | SSX2       | 4.005907392 | 0.03025068 |
| CIB4          | 5.542421462  | 0.006344489  | IL17REL      | 4.801767819  | 0.00336 | XAGE1D     | 3.78646867  | 0.02639049 | GAGE8      | 3.973611276 | 0.03966881 |
| TLL2          | 5.502385296  | 0.006993371  | TRIML2       | 4.668769472  | 0.01595 | PABPC12B   | 3.6701519   | 0.02132082 | SPACA1     | 3.807354922 | 0.04874731 |
| IFITM5        | 5.239709767  | 0.041785865  | RP11         | 4.502733507  | 0.03916 | TPRRT      | 3.64983451  | 8.50E-06   | OR8A1      | 3.709460499 | 0.00316217 |
| TIPARP        | 5.021939147  | 0.039978781  | TBX10        | 4.472770595  | 0.00959 | OR8A1      | 3.60992113  | 0.00195742 | CGA        | 3.437170756 | 0.00198869 |
| SLC8A1        | 5.018940109  | 0.043888801  | AK093002     | 4.428159445  | 0.01006 | CGA        | 3.55726059  | 0.04434046 | LOC348021  | 3.32492902  | 0.01818799 |
| AK091729      | 4.779418674  | 0.046404664  | LOC494141    | 3.979636105  | 0.03110 | MAGEB6     | 3.34063247  | 0.00924267 | C7         | 3.170246407 | 5.68E-05   |
| NTN3          | 4.699663842  | 0.006911973  | GRIK5        | 3.943006643  | 0.04724 | NCRNA00200 | 3.30297421  | 0.01912291 | PABPC12B   | 2.881018425 | 0.01344203 |
| FAM9C         | 4.697800912  | 0.007437151  | ATP10B       | 3.901132671  | 0.02228 | BPESC1     | 3.20943162  | 0.00595498 | PIGR       | 2.853126792 | 0.00173869 |
| NXNL2         | 4.673342092  | 0.019596239  | FGF          | 3.863986331  | 0.01190 | GPR64      | 3.09924532  | 5.14E-05   | GABRG2     | 2.83078452  | 0.03458823 |
| LOC100506730  | 4.652089627  | 0.047854364  | AK056887     | 3.719072657  | 0.00493 | PANX3      | 3.08017506  | 0.0059142  | CRTAC1     | 2.813519774 | 1.59E-05   |
| AK094577      | 4.593986107  | 0.000103129  | ABHD1        | 3.713649521  | 0.03670 | HSST4      | 3.07527343  | 0.00034294 | TF1F       | 2.792195812 | 0.01268613 |
| TBX10         | 4.525318833  | 0.013276925  | GRIN3A       | 3.706993954  | 0.02539 | GABRG2     | 3.05749104  | 0.00239052 | SLC38A8    | 2.757270334 | 0.00919325 |
| TMIE          | 4.517565838  | 0.029484905  | DEFB124      | 3.543091681  | 0.03805 | ZIC2       | 3.0465538   | 0.00261145 | SLC44A4    | 2.735312897 | 0.00056991 |
| GRIK1         | 4.47475979   | 0.02821595   | ZP1          | 3.522836667  | 0.01918 | FAM123A    | 3.01202226  | 0.00131872 | ANGPTL7    | 2.729189436 | 0.00385304 |
| PRKAG3        | 4.331722869  | 0.026115227  | AK123450     | 3.516912447  | 0.00428 | DRD2       | 2.99742808  | 3.08E-06   | GAGE2A     | 2.725929618 | 0.04538448 |
| SLC6A4        | 4.124948641  | 0.04062148   | CLEC9A       | 3.513366355  | 0.02036 | TP73       | 2.96144635  | 1.50E-07   | OR7E5P     | 2.672449623 | 0.03534633 |
| LPAR4         | 4.056102105  | 0.04268291   | TPO          | 3.497630719  | 0.01047 | VIT        | 2.94667087  | 8.10E-06   | FCAMR      | 2.669343994 | 7.34E-05   |
| ANXA13        | 4.052885868  | 0.011945107  | GLD5         | 3.426685794  | 0.02329 | NFASC      | 2.92584207  | 7.86E-06   | NCRNA00052 | 2.661039672 | 0.01195538 |
| FGF           | 4.025989727  | 0.005187143  | RASA4CP      | 3.348876404  | 0.01468 | LOC348021  | 2.92492902  | 0.05180449 | LY6G6F     | 2.624832194 | 0.03215633 |
| MAR4          | 3.870006874  | 0.043287681  | RP3A         | 3.245058593  | 0.00579 | CYP4X1     | 2.9207511   | 0.0001008  | NGFR       | 2.554816762 | 5.74E-07   |
| AK024736      | 3.774088451  | 0.014528722  | GUCA1B       | 3.232228545  | 0.02331 | CRTAC1     | 2.87404731  | 0.0002275  | PTPR       | 2.552657607 | 0.00027074 |
| AK128708      | 3.692015861  | 0.001341628  | C19orf83     | 3.191135457  | 0.01322 | ADCY5      | 2.85809697  | 3.28E-05   | ABCA8      | 2.541942223 | 2.03E-05   |
| GRIA4         | 3.651999261  | 0.02865887   | SLC6A10P     | 3.145316915  | 0.00038 | ZBTBB8     | 2.85808806  | 8.16E-05   | VIT        | 2.525664901 | 0.00022548 |
| LINC00491     | 3.603976673  | 0.036705444  | FCRL1        | 2.997812435  | 0.03861 | SSX4       | 2.84121691  | 0.02141746 | DRD2       | 2.514807943 | 2.19E-05   |
| DKFZp434J0226 | 3.558614319  | 0.010748635  | AQP4         | 2.995801255  | 0.00601 | LEFTY2     | 2.82537633  | 0.000636   | ABCA13     | 2.351888464 | 0.00097296 |
| MYOM2         | 3.540636408  | 0.025883866  | LOC155060    | 2.991451077  | 0.05002 | KIAA0319   | 2.80204189  | 7.37E-06   | PEG3       | 2.350533558 | 0.00562794 |
| AK124970      | 3.358091144  | 0.049041097  | TAT          | 2.913089419  | 0.01823 | FAM135B    | 2.74453756  | 0.00033217 | C1orf146   | 2.321928095 | 0.03256025 |
| LHX1          | 3.350989863  | 0.027099116  | LRRC46       | 2.84854943   | 0.01623 | NGFR       | 2.72813728  | 1.92E-06   | CADM3      | 2.315570702 | 0.00011626 |
| LINC00964     | 3.323078307  | 0.006463998  | CSN1S1       | 2.800142359  | 0.01606 | BMP7       | 2.71770217  | 0.00054048 | SLC7A3     | 2.308138396 | 0.00092039 |
| LOC389705     | 3.308892993  | 0.01250708   | SCGB1A1      | 2.749999611  | 0.04515 | ADAMTS18   | 2.68419729  | 2.44E-05   | DSCAM1     | 2.307432823 | 1.46E-05   |
| NKX2          | 3.212344494  | 0.006488279  | LINC00202    | 2.747357412  | 0.02140 | GP2        | 2.68028343  | 0.01533261 | ALB        | 2.282947622 | 0.00016014 |
| BC033241      | 3.145756283  | 0.033993858  | CFHR1        | 2.71708801   | 0.04710 | FSTL4      | 2.67952329  | 0.00012373 | KIRREL2    | 2.27486237  | 0.00043675 |
| AK021876      | 3.135691395  | 0.052528899  | SEMA3A       | 2.702752905  | 0.00592 | HOXB13     | 2.65050022  | 0.01111597 | C2orf114   | 2.262569516 | 0.046725   |
| SLCSA11       | 3.096699035  | 0.010702889  | KRT9         | 2.637140327  | 0.01601 | NTRK2      | 2.6485934   | 1.83E-06   | TP73       | 2.258174427 | 1.87E-05   |
| AK097921      | 3.045190181  | 0.003364293  | AL592528     | 2.631859891  | 0.01351 | SPSB4      | 2.59502837  | 0.00036131 | SERPINA11  | 2.257518278 | 0.00202861 |
| BC044608      | 3.036226991  | 0.012132061  | BC036382     | 2.630416346  | 0.03850 | RET        | 2.59075573  | 8.03E-06   | COL11A2    | 2.235717668 | 0.00121666 |
| LOC155060     | 2.826289683  | 0.014577276  | BX648455     | 2.427905175  | 0.03460 | DEFB132    | 2.57646585  | 0.02185179 | PLA2G2A    | 2.234948466 | 0.00394852 |
| CT45A1        | 2.820927706  | 0.001908482  | RGS9BP       | 2.426216685  | 0.02888 | C1QL1      | 2.56560947  | 0.00015401 | HPCAL4     | 2.226773342 | 2.85E-07   |
| LINC00886     | 2.789380613  | 0.003908043  | PACRG        | 2.403796277  | 0.01022 | MYBPC1     | 2.55612213  | 0.01002825 | FBN3       | 2.226347371 | 0.00915598 |
| AK128252      | 2.785083511  | 0.022883708  | LOC100506022 | 2.368848311  | 0.04098 | ABCA13     | 2.5477581   | 0.00079225 | TCEAL2     | 2.209844999 | 0.00321494 |
| ANKRD30B      | 2.690610855  | 0.037723802  | RP11         | 2.343006996  | 0.00004 | IGFBP1     | 2.53874659  | 0.00014519 | BCAN       | 2.206988398 | 0.00307728 |
| NCR1          | 2.682998696  | 0.002128345  | HPSE2        | 2.341521669  | 0.03457 | PEG3       | 2.52592355  | 0.00710329 | CCor1f5    | 2.200495244 | 3.10E-05   |
| GAST          | 2.675539776  | 0.020999959  | ADAMTS8      | 2.320057907  | 0.00719 | MYO16      | 2.51022257  | 1.64E-05   | ADH1B      | 2.195066528 | 0.02945002 |
| CETN4P        | 2.666792752  | 0.0371100539 | PLD5         | 2.315409111  | 0.01285 | KYNB1      | 2.5009036   | 0.00019427 | KNH3       | 2.194414286 | 2.65E-06   |
| LOC101059948  | 2.651440569  | 0.001045381  | BCAN         | 2.283520792  | 0.00526 | UNC5D      | 2.49116825  | 0.0063889  | LEFTY2     | 2.188631546 | 0.00366389 |
| SIGLEC17P     | 2.636115466  | 0.029118709  | STK32B       | 2.267200192  | 0.00626 | MUC16      | 2.49083659  | 0.00478554 | TMEM59L    | 2.171111076 | 3.24E-06   |
| LRRC46        | 2.562091538  | 0.026033824  | LOC100130298 | 2.257475943  | 0.02049 | DSCR4      | 2.49020853  | 0.05402415 | FAM135B    | 2.147689977 | 0.0005946  |
| BC141952      | 2.508584977  | 0.026633284  | RPRM         | 2.254338594  | 0.03880 | C10orf90   | 2.48512597  | 0.00055527 | CRLF1      | 2.128669932 | 0.00274967 |
| KIAA2022      | 2.499643714  | 0.013209177  | CYP4F22      | 2.231054897  | 0.00107 | TCEAL2     | 2.4755231   | 0.00249308 | CMTM5      | 2.122300929 | 0.02677471 |
| KF274612      | 2.481023208  | 0.023280248  | BC062291     | 2.217284554  | 0.01233 | C2orf40    | 2.47185514  | 0.00268219 | KCNC2      | 2.112916521 | 0.03583952 |
| ALB32163      | 2.466024503  | 0.000275446  | COL23A1      | 2.214001182  | 0.00032 | HOTAIR     | 2.471133479 | 0.00025374 | KNB1       | 2.111357095 | 0.00070605 |
| KNH3          | 2.445352169  | 0.007857042  | BC040901     | 2.130167212  | 0.02284 | EGF        | 2.46034714  | 0.00017737 | ADCY5      | 2.109804586 | 0.00027355 |
| ABHD1         | 2.42579731   | 0.050058955  | SLC25A21     | 2.122326393  | 0.00040 | MGAT5B     | 2.46019527  | 0.00015097 | MUC5       | 2.109687118 | 0.00087332 |
| CBLN2         | 2.383375531  | 0.030188307  | AGR3         | 2.077650249  | 0.00286 | SCARA5     | 2.45647702  | 0.00017773 | ALPPL2     | 2.107448438 | 0.01653342 |
| BC068290      | 2.365398509  | 0.025128632  | GREB1L       | 2.070130776  | 0.00702 | SLC35F3    | 2.45607303  | 0.00071146 | CD300LG    | 2.105907769 | 0.00054585 |
| TAT           | 2.344279688  | 0.002168722  | PPP1R36      | -2.005576658 | 0.01689 | C3orf15    | 2.45428124  | 4.07E-05   | DARC       | 2.104579101 | 8.98E-05   |
| OTOF          | 2.342409809  | 0.001042041  | MKRN9P       | -2.089792473 | 0.01668 | LGR6       | 2.43062482  | 0.00259813 | PSD2       | 2.094292737 | 9.25E-06   |
| AK311558      | 2.341525373  | 0.019807594  | TNFSF12      | -2.096986869 | 0.00258 | ACSL6      | 2.42609176  | 0.00054393 | V5IG2      | 2.074173441 | 0.0041711  |
| RGS9BP        | 2.264883564  | 0.04496302   | DNASE1L2     | -2.124655199 | 0.01402 | AQP5       | 2.4126752   | 0.00141582 | SLC13A2    | 2.073157637 | 0.00826831 |
| DQ593432      | 2.246610581  | 0.041841021  | ID1          | -2.146826115 | 0.04456 | CSMD3      | 2.40356486  | 0.00168836 | FIGF       | 2.069070848 | 2.42E-05   |
| CYP4F22       | 2.217945918  | 0.010289675  | BC035726     | -2.201031184 | 0.00289 | SLC17A8    | 2.39853304  | 0.01252614 | HS3ST4     | 2.063154337 | 0.01461291 |
| V5IG8         | 2.186892825  | 0.022232452  | TMEM151B     | -2.205214875 | 0.04913 | ADAM27     | 2.39450391  | 3.24E-05   | GRPR       | 2.054248392 | 0.00014734 |
| PACRG         | 2.150946354  | 0.004838196  | PFKFB1       | -2.205971096 | 0.03231 | FABP7      | 2.38690602  | 0.0067096  | PGM5       | 2.049250323 | 3.01E-06   |
| FCRL1         | 2.097513229  | 0.002802256  | BC033961     | -2.211363702 | 0.03733 | MSTN       | 2.36776749  | 9.52E-07   | GRIK3      | 2.041626159 | 0.00064521 |
| MIR29C        | 2.073467429  | 0.044759358  | LOC100128398 | -2.223668441 | 0.00749 | FCAMR      | 2.35728859  | 0.00207052 | FABP4      | 2.037073051 | 0.01629332 |
| KCNE2         | 2.022137329  | 0.008502552  | LOC100289333 | -2.227575745 | 0.02743 | COL11A2    | 2.3546374   | 0.00059659 | HLF        | 2.034362803 | 1.26E-06   |
| EGOT          | 2.010978885  | 0.000112788  | FCN2         | -2.2700934   | 0.02713 | ZNF541     | 2.35341666  | 1.39E-06   | FAM163B    | 2.028231216 | 0.00587802 |
| SFTA1P        | -2.075774235 | 0.035199114  | EML5         | -2.292035404 | 0.04741 | APL1P      | 2.35165613  | 1.01E-05   | HTR3E      | 2.022609093 | 0.00103446 |
| AK092862      | -2.092409032 | 0.03439314   | ABCA17P      | -2.302978936 | 0.00079 | PDZD4      | 2.35058517  | 0.00011228 | CA10       | 2.020131286 | 0.04210319 |
| BC069004      | -2.095062307 | 0.009578383  | ACVR2B       | -2.342205582 | 0.03647 | TF1F       | 2.34396247  | 0.04663419 | PHF21B     | 2.016670795 | 0.00336995 |
| LCE3D         | -2.106312802 | 0.028925308  | TPRG1        | -2.366380985 | 0.02611 |            |             |            |            |             |            |

|              |              |             |
|--------------|--------------|-------------|
| CDX2         | -2.401169832 | 0.006452237 |
| SPRR3        | -2.441228869 | 0.024739367 |
| ANKRD53      | -2.453846199 | 0.001878242 |
| GABRQ        | -2.501146314 | 0.044903436 |
| KRTAP2       | -2.548637667 | 0.033642949 |
| DTHD1        | -2.565486595 | 0.047570892 |
| CEACAM3      | -2.723405288 | 0.025017413 |
| PKD1L2       | -2.763740872 | 0.007404966 |
| ST6GALNAC1   | -2.831387322 | 0.031461658 |
| PCDHA5       | -2.848343512 | 0.036222013 |
| C5orf58      | -2.855074592 | 0.041675064 |
| NEB          | -2.866211337 | 0.015925502 |
| AK055145     | -2.934714236 | 0.008211822 |
| UCN3         | -2.979796716 | 0.049892677 |
| TAS2R20      | -2.997311776 | 0.054397372 |
| LDLRAD1      | -3.080739492 | 0.049392514 |
| ACER1        | -3.129316164 | 0.028042973 |
| VSIG1        | -3.213610381 | 0.011822165 |
| TERT         | -3.234428481 | 0.001813266 |
| LOC101929371 | -3.327295945 | 0.028241422 |
| LINC00704    | -3.380455548 | 0.000121024 |
| KLRC2        | -3.418587544 | 0.035159152 |
| LOC100128885 | -3.545123825 | 0.046663413 |
| SLC5A9       | -3.570385843 | 0.010350715 |
| TPTE2        | -3.59066614  | 0.005005009 |
| KCND3        | -3.767100661 | 0.006359175 |
| LIPK         | -3.786606068 | 0.018155876 |
| SYCP1        | -4.013518443 | 0.000737165 |
| PTENP1       | -4.026028206 | 0.007491011 |
| HTR1B        | -4.099249722 | 0.000673801 |
| BC042048     | -4.252234712 | 0.021526668 |
| FSIP2        | -4.330980777 | 0.006775693 |
| BARHL2       | -4.533341133 | 0.036224616 |
| TRIM61       | -4.824186152 | 0.045914257 |
| PLA2G4D      | -4.851159208 | 0.00494489  |
| PSD2         | -5.031777704 | 0.00264492  |
| MIR1287      | -6.807836626 | 0.001615764 |
| MRV1         | -7.471754307 | 0.001013811 |
| LOC149134    | -9.346958153 | 0.009217588 |
| CTNNA3       | -9.503987925 | 0.001025283 |

|              |              |          |
|--------------|--------------|----------|
| NKPD1        | -2.546634759 | 0.023303 |
| HPD          | -2.549056925 | 0.03248  |
| AK054623     | -2.549610161 | 0.03992  |
| KIAA1045     | -2.564911299 | 0.03499  |
| GQ868703     | -2.58909239  | 0.02489  |
| FGF3         | -2.59115296  | 0.03127  |
| RAB3C        | -2.627685687 | 0.01705  |
| GLIPR1L2     | -2.769083613 | 0.03207  |
| NANOGP1      | -2.769676445 | 0.00240  |
| CTB          | -2.77607856  | 0.03741  |
| ZNF205       | -2.779595924 | 0.00515  |
| AFF2         | -2.801298499 | 0.04650  |
| SPDYE3       | -2.845122886 | 0.02677  |
| DQ570052     | -2.861320139 | 0.02268  |
| AJ004954     | -2.928448457 | 0.00170  |
| HMX2         | -2.954219402 | 0.01644  |
| BC022047     | -2.983168874 | 0.01477  |
| CBLN1        | -2.996123794 | 0.03118  |
| AK055145     | -3.11419025  | 0.01352  |
| RP11         | -3.145722571 | 0.00621  |
| ZNF541       | -3.150156428 | 0.00349  |
| GAS6         | -3.20021277  | 0.04143  |
| BC112312     | -3.205005731 | 0.01768  |
| NLRP7        | -3.221972591 | 0.03801  |
| OPRD1        | -3.276302988 | 0.02109  |
| MLLT10P1     | -3.32902795  | 0.00832  |
| AX746967     | -3.411509805 | 0.01393  |
| USP41        | -3.536409211 | 0.02375  |
| RAB6C        | -3.549294489 | 0.00866  |
| TPTE2        | -3.59066614  | 0.04414  |
| BC015433     | -3.600395762 | 0.03024  |
| KCP          | -3.630038375 | 0.02330  |
| LOC101929371 | -3.779123688 | 0.01185  |
| GBX2         | -3.868045023 | 0.00145  |
| TEKT3        | -4.279954838 | 0.01309  |
| INS          | -4.327887578 | 0.00222  |
| A2M          | -4.328395239 | 0.01081  |
| CEACAM3      | -4.329816963 | 0.04844  |
| KLRC2        | -4.543365862 | 0.02354  |
| UGT2A3       | -4.909014752 | 0.00005  |
| WFD05        | -4.950341087 | 0.00959  |
| SLC10A4      | -5.59297842  | 0.00606  |
| MEGF11       | -5.652401261 | 0.02145  |
| FGF19        | -5.79777243  | 0.01919  |
| C6orf165     | -5.930897098 | 0.00263  |
| TCRBV13S5    | -6.383193393 | 0.00524  |
| PRSS41       | -6.931128841 | 0.00011  |
| CCDC17       | -7.019501525 | 0.02745  |
| NPPFR1       | -7.812356257 | 0.02420  |

|             |            |             |
|-------------|------------|-------------|
| LAMA3       | 2.26834126 | 8.19E-06    |
| DKK1        | 2.26454674 | 0.003700699 |
| CNTN2       | 2.26353702 | 0.0002526   |
| TMEM59L     | 2.26255183 | 1.51E-05    |
| KCNH3       | 2.26151492 | 8.65E-06    |
| TRIM9       | 2.25569206 | 1.30E-05    |
| UGT2B15     | 2.25447906 | 0.00578208  |
| MPPED2      | 2.25353199 | 8.87E-05    |
| TRPM6       | 2.25316513 | 0.00056613  |
| EPHA10      | 2.25203238 | 2.55E-05    |
| NALCN       | 2.22742649 | 0.00067743  |
| C10orf94    | 2.22193896 | 0.03469977  |
| CRLF1       | 2.21909243 | 0.00822098  |
| PPP1R1A     | 2.21105315 | 0.0057855   |
| AGR3        | 2.2087265  | 0.02547382  |
| KGFLP1      | 2.20705129 | 4.03E-05    |
| BPIL3       | 2.19615874 | 0.03740995  |
| RELN        | 2.19497413 | 0.00095133  |
| MYRIP       | 2.19429425 | 0.00035178  |
| CNTFR       | 2.19336756 | 0.00715889  |
| BCAN        | 2.18998729 | 0.01191845  |
| GKN2        | 2.18738401 | 0.001227    |
| PAK7        | 2.18548205 | 0.00010519  |
| ATP4B       | 2.18438628 | 0.00049823  |
| LRRN2       | 2.17953256 | 9.22E-05    |
| AGXT        | 2.1792395  | 0.04670918  |
| CNTN5       | 2.16892078 | 0.0048458   |
| LYPD6       | 2.16662767 | 2.91E-05    |
| ZBTB16      | 2.16609198 | 0.00034971  |
| SYT13       | 2.16583311 | 0.0261753   |
| CD300LG     | 2.16443805 | 0.00461307  |
| FLJ12825    | 2.16374654 | 2.95E-05    |
| ALX4        | 2.14540075 | 0.00790716  |
| JAKMIP1     | 2.14070524 | 0.00026679  |
| C4BPA       | 2.13922351 | 0.00670343  |
| LHX2        | 2.13830816 | 0.00093837  |
| PHF21B      | 2.13249013 | 0.00550671  |
| KSR2        | 2.11876042 | 0.00040847  |
| ATRNL1      | 2.11314974 | 0.0077298   |
| RGS9        | 2.09671095 | 0.00244697  |
| ABCA10      | 2.08971301 | 4.75E-06    |
| ODZ2        | 2.08772057 | 0.00040929  |
| USP44       | 2.08068645 | 0.00021401  |
| FRMPD4      | 2.07884547 | 0.00282057  |
| MATN2       | 2.07706237 | 3.09E-05    |
| CMTM5       | 2.06633074 | 0.03014593  |
| TMPRSS5     | 2.0619219  | 0.00079965  |
| TFF3        | 2.06031957 | 0.02679928  |
| SCUBE2      | 2.05956914 | 0.00016425  |
| LOC10019093 | 2.05765454 | 3.78E-05    |
| MEGF10      | 2.05489027 | 0.00099338  |
| CHRDL2      | 2.05247932 | 0.0096111   |
| GPR143      | 2.04964277 | 0.00015707  |
| CCDC129     | 2.0458384  | 0.00883065  |
| XIST        | 2.04569904 | 5.01E-06    |
| ALDH8A1     | 2.03645167 | 1.49E-06    |
| SLC22A3     | 2.02000602 | 0.00041539  |
| CACNB4      | 2.00331001 | 0.00017743  |
| PAK3        | 2.00313111 | 0.0002573   |
| PSD2        | 1.99954317 | 0.00065213  |
| HTR3E       | 1.99835795 | 0.0012338   |
| SOX8        | 1.99514575 | 0.01273639  |
| S100P       | -1.9814501 | 0.02631588  |
| KRT4        | -2.0020207 | 0.04588919  |
| LCN2        | -2.1019715 | 0.00842713  |
| CWH43       | -2.1232815 | 0.01570089  |
| ADH7        | -2.1415763 | 0.05358521  |
| ZCCHC16     | -2.1756875 | 0.01463716  |
| KRT79       | -2.2267249 | 0.02585675  |
| PSAPL1      | -2.2332604 | 0.03963001  |
| TDRD1       | -2.2892698 | 0.02376192  |
| SPRR1A      | -2.2925772 | 0.01926323  |
| CA9         | -2.4991546 | 0.00119703  |
| LCE2A       | -2.6297223 | 0.01631921  |
| LY6D        | -2.631763  | 0.00681274  |
| OC90        | -2.6996269 | 0.04516405  |
| VSTM2B      | -2.9321935 | 0.04889516  |
| S100A7      | -3.0333387 | 0.04802538  |
| DPP10       | -3.1546539 | 0.00503713  |
| PRAMEF1     | -3.169925  | 0.00428433  |
| MT4         | -3.3219281 | 0.04564901  |
| C10orf129   | -3.6892849 | 2.89E-06    |
| RETNLB      | -3.7004397 | 0.01522475  |
| SEMG2       | -4.2637385 | 0.02098346  |
| DNAJC5G     | -5.1978951 | 3.22E-05    |
| GJA8        | -5.4594316 | 4.54E-05    |
| FTHL17      | -5.9985009 | 0.00500081  |
| NXF2        | -8.4426696 | 0.00020272  |

|           |              |            |
|-----------|--------------|------------|
| EPS8L3    | -2.009043403 | 0.02682371 |
| FAM25A    | -2.031415226 | 0.04227349 |
| FOXP1     | -2.057088689 | 0.04731655 |
| TNP1      | -2.069800224 | 0.04517713 |
| CSRP3     | -2.163951032 | 0.04043304 |
| S100A8    | -2.213164841 | 0.00232077 |
| PLA2G2F   | -2.227270831 | 0.0184851  |
| MMP1      | -2.247894759 | 0.00145372 |
| CNBD1     | -2.299309881 | 0.00964119 |
| LY6D      | -2.32050497  | 0.00640054 |
| SPANXA2   | -2.395383247 | 0.04964038 |
| C10orf129 | -2.395843219 | 0.01357891 |
| DGAT2L6   | -2.464385619 | 0.03097603 |
| TMEM6C    | -2.471679166 | 0.03811362 |
| KRT79     | -2.508123781 | 0.00695036 |
| DPP10     | -2.648165149 | 0.01644482 |
| RPTN      | -2.876242708 | 0.02371727 |
| CA9       | -2.894237811 | 0.00016249 |
| C17orf77  | -2.895891196 | 0.00960288 |
| HTR3B     | -3.272896374 | 0.05281384 |
| S100A7A   | -3.306489796 | 0.01346404 |
| F9        | -3.564641508 | 0.0383062  |
| MT4       | -3.704695468 | 0.00430409 |
| S100A7    | -3.73998807  | 0.0037761  |
| PTPN20A   | -4.279735821 | 0.03365632 |
| SPINT3    | -4.321928095 | 0.0243849  |
| PMCHL2    | -4.33974005  | 0.04461753 |
| CFHR5     | -4.690492758 | 0.0022544  |
| VSTM2B    | -4.857980995 | 0.02629207 |
| PNLIP     | -5.166577675 | 0.00124963 |
| GJA8      | -5.459431619 | 0.00131355 |
| ISX       | -5.873288558 | 0.0096147  |
| NXF2      | -7.633624223 | 0.00017764 |

Supplemental Fig. 4

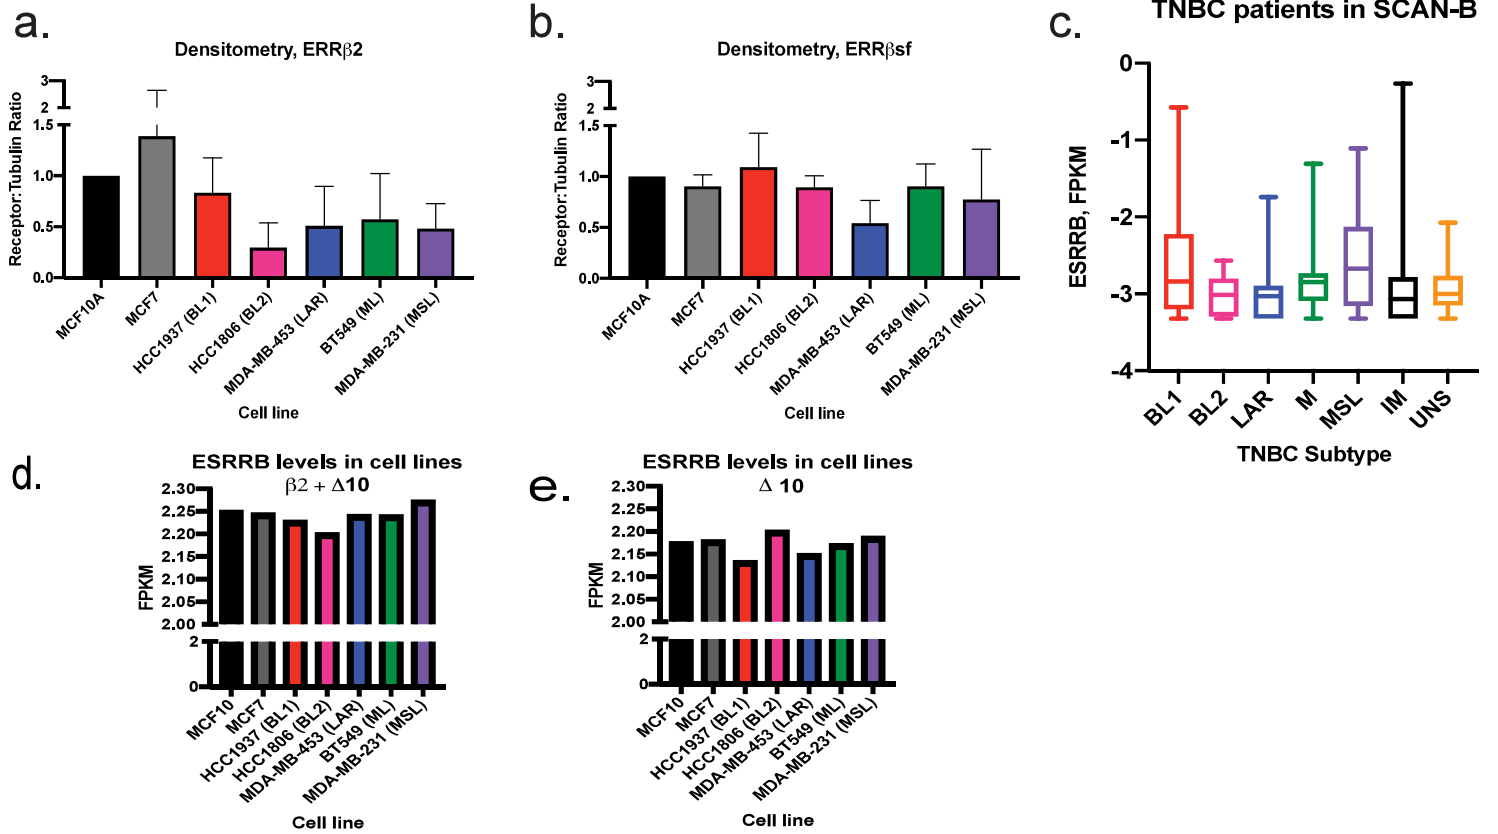

Supplemental Fig. 5

a.

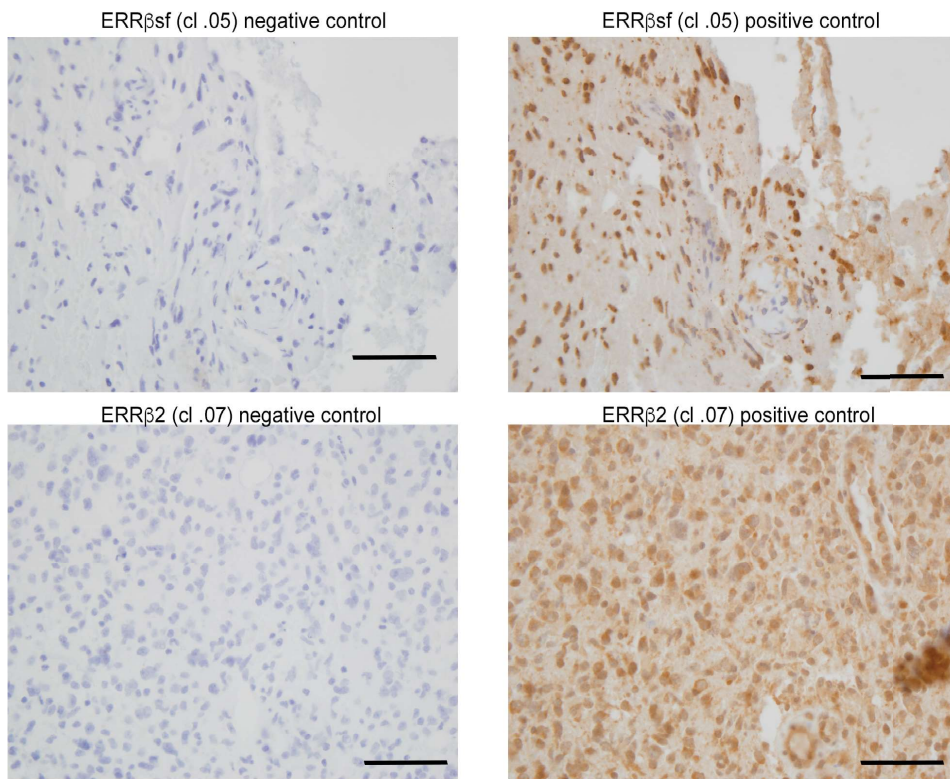

b.

ERR $\beta$ sf (cl .05) Nuclear and cytoplasmic staining      ERR $\beta$ sf (cl .05) Cytoplasmic staining

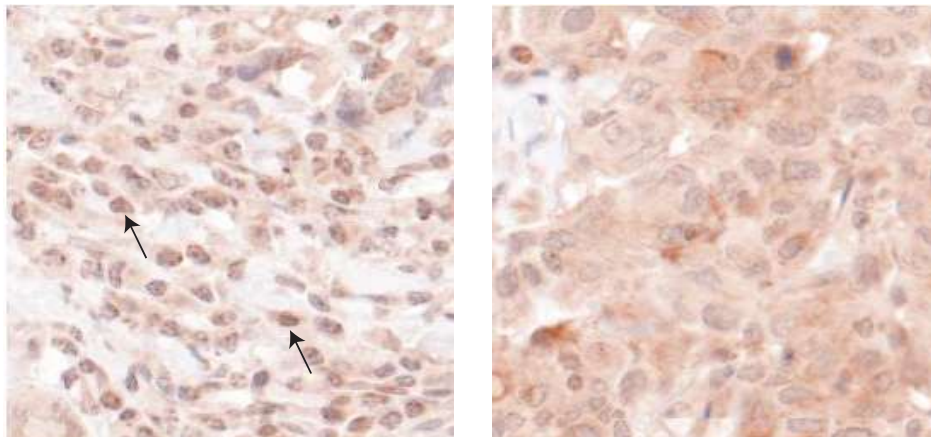

ERR $\beta$ 2 (cl .07) Nuclear and cytoplasmic staining      ERR $\beta$ 2 (cl .07) Cytoplasmic staining

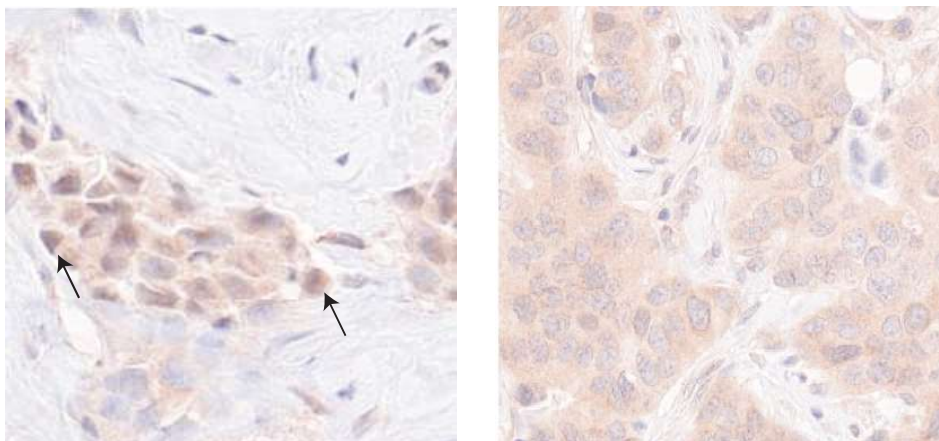

Supplemental Table 2. ERRβ isoform expression and subcellular localization in TMA

2.1

|                               | ERRβ2                        | ERRβsf                       | ERRβ2:ERRβsf                 |
|-------------------------------|------------------------------|------------------------------|------------------------------|
|                               | Mean(sd), median[IQR]        |                              |                              |
| <b>ER+</b><br>(n=50)          | 0.86(0.10), 0.87[0.82, 0.94] | 0.66(0.16), 0.68[0.58, 0.77] | 1.39(0.52), 1.27[1.11, 0.49] |
| <b>HER2+</b><br>(n=50)        | 0.90(0.13), 0.95[0.87, 0.98] | 0.70(0.17), 0.71[0.59, 0.82] | 1.36(0.39), 1.28[1.13, 1.45] |
| <b>TNBC</b><br>(n=50)         | 0.85(0.23), 0.94[0.82, 0.98] | 0.71(0.23), 0.77[0.65, 0.88] | 1.28(0.53), 1.17[1.07, 1.30] |
| <b>Kruskal-Wallis p-value</b> | 0.016*                       | 0.086                        | 0.095                        |

2.2

|                        | ERRβ2                          |                                | ERRβsf                         |                                |
|------------------------|--------------------------------|--------------------------------|--------------------------------|--------------------------------|
|                        | Nuclear                        | Cytoplasmic                    | Nuclear                        | Cytoplasmic                    |
|                        | Mean(sd), median[IQR]          |                                | Mean(sd), median[IQR]          |                                |
| <b>ER+</b><br>(n=50)   | 0.65 (0.36), 0.67 [0.37, 1.00] | 0.55 (0.40), 0.47 [0.16, 0.96] | 0.17 (0.15), 0.13 [0.03, 0.29] | 0.11 (0.09), 0.09 [0.04, 0.14] |
| <b>HER2+</b><br>(n=50) | 0.98 (0.05), 1.00 [0.99, 1.00] | 0.03 (0.06), 0.01 [0.00, 0.03] | 0.35 (0.25), 0.37 [0.13, 0.46] | 0.20 (0.18), 0.16 [0.07, 0.29] |
| <b>TNBC</b><br>(n=50)  | 0.96 (0.17), 1.00 [1.00, 1.00] | 0.07 (0.19), 0.01 [0.00, 0.02] | 0.33 (0.25), 0.32 [0.11, 0.43] | 0.22 (0.20), 0.15 [0.07, 0.31] |



Supplemental Table 3. ERRβ isoform expression and clinical features

| ERRβ2                                 |                                   |    |             |             |         | ERRβsf                                |                                   |    |             |             |         |        |
|---------------------------------------|-----------------------------------|----|-------------|-------------|---------|---------------------------------------|-----------------------------------|----|-------------|-------------|---------|--------|
| Receptor Status and Lymph Node Status |                                   |    |             |             |         | Receptor Status and Lymph Node Status |                                   |    |             |             |         |        |
|                                       | Source                            | DF | Anova SS    | Mean Square | F Value | Pr > F                                | Source                            | DF | Anova SS    | Mean Square | F Value | Pr > F |
| w/ interaction                        | Receptor Status                   | 2  | 15.34       | 7.67        | 3.03    | 0.052                                 | Receptor Status                   | 2  | 5.63        | 2.82        | 2.41    | 0.094  |
|                                       | Lymph Node Status                 | 1  | 1.26        | 1.26        | 0.5     | 0.482                                 | Lymph Node Status                 | 1  | 2.72        | 2.72        | 2.32    | 0.13   |
|                                       | Receptor Status*Lymph Node Status | 2  | 0.8         | 0.4         | 0.16    | 0.856                                 | Receptor Status*Lymph Node Status | 2  | 0.71        | 0.35        | 0.3     | 0.741  |
| w/o interaction                       | Source                            | DF | Anova SS    | Mean Square | F Value | Pr > F                                | Source                            | DF | Anova SS    | Mean Square | F Value | Pr > F |
|                                       | Receptor Status                   | 2  | 15.34       | 7.67        | 3.03    | 0.052                                 | Receptor Status                   | 2  | 5.63        | 2.82        | 2.41    | 0.094  |
|                                       | Lymph Node Status                 | 1  | 1.26        | 1.26        | 0.5     | 0.482                                 | Lymph Node Status                 | 1  | 2.72        | 2.72        | 2.32    | 0.13   |
| Receptor Status and Race              |                                   |    |             |             |         | Receptor Status and Race              |                                   |    |             |             |         |        |
|                                       | Source                            | DF | Anova SS    | Mean Square | F Value | Pr > F                                | Source                            | DF | Anova SS    | Mean Square | F Value | Pr > F |
| w/ interaction                        | Receptor Status                   | 2  | 14.55       | 7.28        | 2.88    | 0.059                                 | Receptor Status                   | 2  | 4.22        | 2.11        | 1.95    | 0.147  |
|                                       | Race                              | 4  | 29.45       | 7.36        | 2.92    | 0.024                                 | Race                              | 4  | 6.93        | 1.73        | 1.6     | 0.179  |
|                                       | Receptor Status*Race              | 6  | 19.08       | 3.18        | 1.27    | 0.27                                  | Receptor Status*Race              | 6  | 19.46       | 3.24        | 2.99    | 0.009  |
| w/o interaction                       | Source                            | DF | Anova SS    | Mean Square | F Value | Pr > F                                |                                   |    |             |             |         |        |
|                                       | Receptor Status                   | 2  | 14.55       | 7.28        | 2.88    | 0.059                                 |                                   |    |             |             |         |        |
|                                       | Race                              | 4  | 29.45       | 7.36        | 2.92    | 0.024                                 |                                   |    |             |             |         |        |
| Receptor Status and Age (years)       |                                   |    |             |             |         | Receptor Status and Age (years)       |                                   |    |             |             |         |        |
|                                       | Source                            | DF | Type III SS | Mean Square | F Value | Pr > F                                | Source                            | DF | Type III SS | Mean Square | F Value | Pr > F |
| w/ interaction                        | Receptor Status                   | 2  | 0.72496893  | 0.36248447  | 0.13    | 0.8753                                | Receptor Status                   | 2  | 0.37197751  | 0.18598875  | 0.15    | 0.859  |
|                                       | Age (years)                       | 1  | 1.09642755  | 1.09642755  | 0.4     | 0.5264                                | Age (years)                       | 1  | 0.14527096  | 0.14527096  | 0.12    | 0.7308 |
|                                       | Receptor Status*Age               | 2  | 0.26823291  | 0.13411645  | 0.05    | 0.9519                                | Receptor Status*Age               | 2  | 0.14740298  | 0.07370149  | 0.06    | 0.9415 |
| w/o interaction                       | Source                            | DF | Type III SS | Mean Square | F Value | Pr > F                                | Source                            | DF | Type III SS | Mean Square | F Value | Pr > F |
|                                       | Receptor Status                   | 2  | 12.56       | 6.28        | 2.34    | 0.1                                   | Receptor Status                   | 2  | 3.7         | 1.85        | 1.54    | 0.219  |
|                                       | Age (years)                       | 1  | 1.13        | 1.13        | 0.42    | 0.518                                 | Age (years)                       | 1  | 0.18        | 0.18        | 0.15    | 0.699  |
